# Supplementary material for: A limited CpG-containing oligodeoxynucleotide therapy regimen induces sustained suppression of allergic airway inflammation in mice
Source: HighWire-hosted journal article supplement (doi:10.1136/thoraxjnl-2013-204605), 2014-01-24
Supplement: thoraxjnl-2013-204605supp.pdf [file thoraxjnl-2013-204605supp.pdf]

**A limited CpG-containing oligodeoxynucleotide therapy regimen induces sustained suppression of allergic airway inflammation in mice**

John D. Campbell, PhD,<sup>a</sup> Sariah A. Kell, MS,<sup>a</sup> Heather M. Kozy, BS,<sup>a</sup> Jeremy A. Lum, BS,<sup>a</sup> Rosemary Sweetwood, BA,<sup>a</sup> Mabel Chu, MD,<sup>a</sup> Cameron R. Cunningham, BS,<sup>a</sup> Hugh Salamon, PhD,<sup>b</sup> Clare M. Lloyd, PhD,<sup>c</sup> Robert L. Coffman, PhD,<sup>a</sup> and Edith M. Hessel, PhD<sup>a</sup>

<sup>a</sup>Dynavax Technologies, Berkeley, CA 94710

<sup>b</sup>Knowledge Synthesis, Berkeley, CA 94710

<sup>c</sup>Leukocyte Biology Section, National Heart and Lung Institute, Imperial College London, London SW7 2AZ UK

**Author notes:** J.D. Campbell and S.A. Kell contributed equally to this paper

**ONLINE DATA SUPPLEMENT**

## **SUPPLEMENTAL METHODS**

### **Animal Procedures**

Animal procedures were performed at Pacific Biolabs (Hercules, CA) or Murigenics (Vallejo, CA) and were Institutional and Animal Care Use Committee–approved following the “Guide for the Care and use of Laboratory Animals”, National Research Council (1996). All mice were acclimatized to the facilities for at least one week between shipping and initiation of experimental procedures. In certain Tx Protocol 2 experiments, intraperitoneal injections of protein G-purified anti-IFN- $\gamma$  antibody (2 mg, R46A2(ATCC) or XMG1.2) were concurrent with weekly low dose ragweed exposures after completion of 1018 ISS therapy. Hybridomas secreting XMG1.2 and GL113 (isotype control) were kind gifts from Dr Stephen Stohlman (Cleveland Clinic, OH).

### **Microarray Analysis**

Microarray analysis was performed by Expression Analysis, Inc. (Durham, NC). RNA was extracted from individual mouse lung samples and profiled for quality on the Agilent 2100 bioanalyzer (Agilent Technologies) and for expression on Mouse WG-6 v2 BeadChips (Illumina). Of 45,281 probes targeting transcripts, 30,221 were detected in >95% of samples. Log-2 expression levels were further analyzed using R (The Comprehensive R Archive Network), specifically to perform T-tests with Welch's correction for unequal variance and to plot data.

## T Cell Analysis

For stimulation of intracellular cytokine responses, isolated and enriched lung T cells ( $1 \times 10^6$ /mL) were incubated in 96 well plates (200  $\mu$ L/well) with irradiated splenic white blood cells ( $5 \times 10^6$ /mL), anti-CD28 (1  $\mu$ g/mL) and RW (250  $\mu$ g/mL) for 6 hours with Brefledin A (5  $\mu$ g/mL) added for the final 4 hours. Intracellular cytokines were quantified as a percentage of CD154 (CD40L) antigen-reactive T cells. In general, cells were pooled per treatment group to facilitate enrichment and/or because individual mice yield low cell numbers. Non-stimulated, enriched lung T cells were surface stained with indicated antibodies (BD Biosciences or eBiosciences). Samples were collected on a FACSCaliber or a LSRII flow cytometer (BD Biosciences). Detailed analysis was performed using Flow Jo software (Tree Star, Inc) with gating through light scatter-defined lymphocytes followed by CD3<sup>+</sup>CD4<sup>+</sup> T cells. To evaluate T<sub>Reg</sub> activity in vitro, enriched lung T cells (pooled/treatment group) were stained for CD4 and CD25 and sorted on a MoFlo high speed sorter (DakoCytomation). 200  $\mu$ L triplicate cultures of CD4<sup>+</sup>CD25<sup>+</sup> (T<sub>Reg</sub>) cells from RW or RW+1018 ISS-treated mice and CD4<sup>+</sup>CD25<sup>-</sup> (T<sub>Eff</sub>) cells ( $5 \times 10^4$ ) from RW-exposed mice were stimulated with anti-CD3 (0.5  $\mu$ g/ml) in the presence of irradiated spleen cells ( $1 \times 10^6$ ) for 48 hours in 96-well U-bottom plates. Proliferation was measured following a final 6 hour pulse with 1  $\mu$ Ci of 3H-Thymidine.

**A) Modified RW + 1018 ISS Tx Protocol 1**

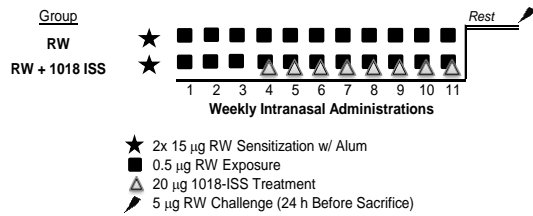

**B)**

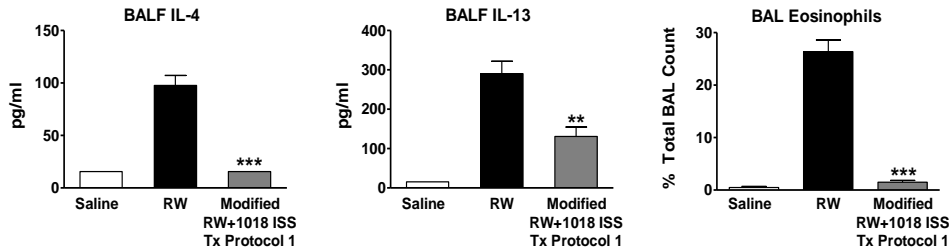

**Figure S1** 1018 ISS treatments initiated after 3 weekly RW exposures significantly suppress lungTh2 responses. (A) Modified Tx Protocol 1 schematic: Mice received 3 weekly intranasal 0.5 µg RW, followed by 8 additional RW, or RW+ 20 µg1018 ISS treatments, 2 weeks rest, and a final 5 µg RW challenge 24 hours before sacrifice (control mice received only saline intranasally). (B) BALF cytokines and eosinophils (mean ± SEM, 8 mice/group). \*\*P <0.01, or \*\*\*P <0.001 compared with the RW exposures only group. Data are representative of two independent experiments.

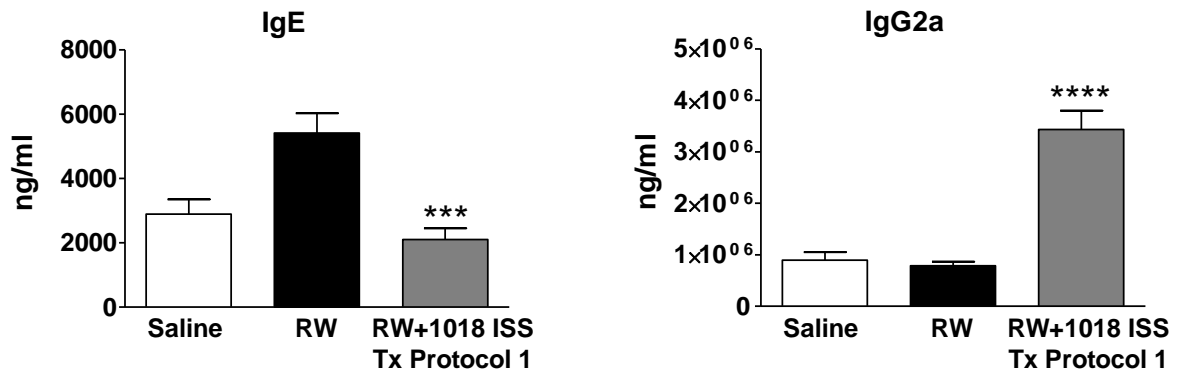

**Figure S2** 1018 ISS treatments induce a Th1-like shift in serum antibodies. Total serum IgE and IgG2a in mice that received 17 weeks of Tx protocol 1 RW+ 1018 ISS, RW or saline, followed by 2 rest and final RW challenge (mean  $\pm$  SEM, 5 mice/group). \*\*\*P < 0.001, \*\*\*\*P < 0.0001, compared with the RW exposed only group. Data are representative of two independent experiments.

**Table S1: Selected Th2-associated genes upregulated in ragweed (RW) allergic mice**

| Genes                                                   |                | With Final Challenge |          | Without Final Challenge |         |
|---------------------------------------------------------|----------------|----------------------|----------|-------------------------|---------|
|                                                         |                | RW versus Saline     |          | RW versus Saline        |         |
| Common Name                                             | <i>mSymbol</i> | Fold Induction       | p-value  | Fold Induction          | p-value |
| Anterior gradient 2 ( <i>Xenopus laevis</i> )           | <i>Agr2</i>    | 17.8                 | 0.0017   | 1.6                     | 0.4602  |
| Arginase, liver                                         | <i>Arg1</i>    | 102.6                | < 0.0001 | 1.6                     | 0.2370  |
| Branched chain aminotransferase 1, cytosolic            | <i>Bcat1</i>   | 13.0                 | 0.0016   | 3.5                     | 0.0233  |
| Chemokine (C-C motif) ligand 7                          | <i>Ccl7</i>    | 31.7                 | 0.0001   | 1.3                     | 0.2655  |
| Chemokine (C-C motif) ligand 8                          | <i>Ccl8</i>    | 22.5                 | < 0.0001 | 3.5                     | 0.0024  |
| Chemokine (C-C motif) ligand 9                          | <i>Ccl9</i>    | 4.5                  | 0.0009   | 1.1                     | 0.7067  |
| Chemokine (C-C motif) ligand 11                         | <i>Ccl11</i>   | 20.0                 | < 0.0001 | 1.9                     | 0.0457  |
| Chemokine (C-C motif) ligand 17                         | <i>Ccl17</i>   | 2.2                  | 0.0129   | 3.3                     | 0.0044  |
| Chemokine (C-C motif) receptor 8                        | <i>Ccr8</i>    | 2.8                  | 0.0817   | 1.5                     | 0.4973  |
| CD209 antigen-like protein E                            | <i>Cd209e</i>  | 192.6                | < 0.0001 | 2.1                     | 0.2032  |
| Chitinase, acidic                                       | <i>Chia</i>    | 8.9                  | < 0.0001 | 1.4                     | 0.0335  |
| Calcium-activated chloride channel family member 3      | <i>Clca3</i>   | 566.7                | < 0.0001 | 449.8                   | 0.0009  |
| Eosinophil-associated, ribonuclease A family, member 11 | <i>Ear11</i>   | 262.0                | < 0.0001 | 21.8                    | 0.0042  |
| FXD domain-containing ion transport regulator 4         | <i>Fxyd4</i>   | 114.1                | 0.0004   | 3.0                     | 0.0651  |
| Glycine amidinotransferase                              | <i>Gatm</i>    | 17.1                 | < 0.0001 | 1.6                     | 0.2127  |
| Interleukin 4                                           | <i>Il4</i>     | 24.2                 | 0.0014   | 1.3                     | 0.6631  |
| Interleukin 5                                           | <i>Il5</i>     | 3.3                  | 0.0123   | 1.7                     | 0.4084  |
| Interleukin 13                                          | <i>Il13</i>    | 1.7                  | 0.0949   | 1.2                     | 0.5898  |
| Interleukin 13 receptor, alpha 2                        | <i>Il13ra2</i> | 52.5                 | < 0.0001 | 1.4                     | 0.1674  |
| Integrin alpha X                                        | <i>Itgax</i>   | 4.0                  | 0.0066   | 1.9                     | 0.3151  |
| Matrix metalloproteinase 12                             | <i>Mmp12</i>   | 2.2                  | 0.0084   | 1.5                     | 0.0662  |
| Homeobox, msh-like 3                                    | <i>Msx3</i>    | 185.1                | < 0.0001 | 1.5                     | 0.3426  |
| Periostin, osteoblast specific factor                   | <i>Postn</i>   | 2.4                  | 0.0572   | 1.4                     | 0.4992  |
| Resistin like alpha                                     | <i>Retnla</i>  | 5.2                  | 0.0046   | 6.2                     | 0.0047  |
| Resistin like beta                                      | <i>Retnlb</i>  | 7.8                  | 0.0006   | 2.5                     | 0.0754  |
| Serum amyloid A 1                                       | <i>Saa1</i>    | 8.8                  | 0.0223   | 2.2                     | 0.2086  |
| Serum amyloid A 3                                       | <i>Saa3</i>    | 5.4                  | 0.0338   | 1.3                     | 0.3834  |
| Scinderin                                               | <i>Scin</i>    | 20.8                 | < 0.0001 | 3.3                     | 0.0232  |
| Selectin, platelet                                      | <i>Selp</i>    | 5.4                  | 0.0002   | 1.2                     | 0.0915  |
| Solute carrier family 26, member 4                      | <i>Slc26a4</i> | 19.1                 | 0.0003   | 4.3                     | 0.0014  |
| Secreted phosphoprotein 1                               | <i>Spp1</i>    | 3.8                  | 0.0014   | 1.2                     | 0.0694  |

Mice were sensitized to ragweed pollen extract in alum by the i.p. route and were exposed weekly to low dose (0.5 µg) ragweed administered by the i.n. route for 16 weeks. Mice were then rested for 2 weeks and given a final challenge with a single high dose (5 µg) of RW 24 hours before sacrifice or were not challenged before sacrifice. Control mice were sensitized by i.p. injection with ragweed, but exposed to saline weekly thereafter. Gene expression was analyzed using Mouse WG-6 v2 BeadChips (Illumina). Values represent fold induction in RW-exposed mice in comparison to saline-exposed mice. Significance was evaluated by student's T test.

**Table S2: Selected CpG-ODN-upregulated genes in ragweed (RW) allergic mice treated with 1018 ISS**

| Genes                                                 | mSymbol         | With Final Challenge      |          | Without Final Challenge     |          |
|-------------------------------------------------------|-----------------|---------------------------|----------|-----------------------------|----------|
|                                                       |                 | RW+1018 ISS versus Saline |          | RW + 1018 ISS versus Saline |          |
| Common Name                                           |                 | Fold Induction            | p-value  | Fold Induction              | p-value  |
| Caspase 1                                             | <i>Casp1</i>    | 2.3                       | < 0.0001 | 2.1                         | < 0.0001 |
| Chemokine (C-C motif) ligand 4                        | <i>Ccl4</i>     | 2.9                       | 0.0392   | 7.9                         | < 0.0001 |
| Chemokine (C-C motif) ligand 5                        | <i>Ccl5</i>     | 2.7                       | 0.0001   | 3.3                         | < 0.0001 |
| Chemokine (C-C motif) ligand 19                       | <i>Ccl19</i>    | 14.9                      | < 0.0001 | 36.3                        | < 0.0001 |
| Chemokine (C-C motif) receptor 5                      | <i>Ccr5</i>     | 10.3                      | < 0.0001 | 9.1                         | < 0.0001 |
| CD72 antigen                                          | <i>Cd72</i>     | 5.4                       | 0.0003   | 6.1                         | 0.0018   |
| Chemokine (C-X-C motif) ligand 9                      | <i>Cxcl9</i>    | 226.4                     | < 0.0001 | 102.9                       | 0.0002   |
| Chemokine (C-X-C motif) ligand 10                     | <i>Cxcl10</i>   | 13.5                      | 0.0030   | 10.0                        | 0.0001   |
| Chemokine (C-X-C motif) ligand 13                     | <i>Cxcl13</i>   | 4.9                       | 0.0021   | 5.8                         | 0.0008   |
| Chemokine (C-X-C motif) receptor 3                    | <i>Cxcr3</i>    | 5.8                       | < 0.0001 | 6.6                         | < 0.0001 |
| Guanylate binding protein 1                           | <i>Gbp1</i>     | 2.7                       | 0.0110   | 1.0                         | 0.5198   |
| Glycosylation dependent cell adhesion molecule 1      | <i>Glycam1</i>  | 14.1                      | 0.0035   | 25.9                        | 0.0078   |
| Interferon-alpha 1                                    | <i>Ifna1</i>    | 3.2                       | 0.0314   | 2.8                         | 0.0870   |
| Interferon-gamma                                      | <i>Ifng</i>     | 24.2                      | < 0.0001 | 16.8                        | < 0.0001 |
| Interleukin 2                                         | <i>Il2</i>      | 2.8                       | 0.0549   | 2.5                         | 0.0338   |
| Interferon regulatory factor 1                        | <i>Irf1</i>     | 1.6                       | 0.0463   | 1.2                         | 0.0109   |
| Jun-B oncogene                                        | <i>Junb</i>     | 1.6                       | 0.0025   | 1.1                         | 0.3886   |
| 26S proteasome regulatory subunit p28                 | <i>Psmc10</i>   | 1.2                       | 0.0123   | 1.2                         | 0.0026   |
| Pentraxin related gene                                | <i>Ptx3</i>     | 1.8                       | 0.0531   | 1.6                         | 0.1309   |
| Src-like-adaptor 2                                    | <i>Sla2</i>     | 6.3                       | 0.0050   | 10.8                        | 0.0002   |
| Signal transducer and activator of transcription 1    | <i>Stat1</i>    | 2.5                       | 0.0109   | 1.5                         | 0.0011   |
| Signal transducer and activator of transcription 4    | <i>Stat4</i>    | 1.6                       | 0.0019   | 1.7                         | 0.0006   |
| Tumor necrosis factor                                 | <i>Tnf</i>      | 2.8                       | 0.0305   | 6.3                         | < 0.0001 |
| Tumor necrosis factor receptor superfamily, member 1b | <i>Tnfrsf1b</i> | 1.9                       | 0.0003   | 2.4                         | < 0.0001 |

Mice were sensitized to ragweed pollen extract in alum by the i.p. route and were exposed weekly to low dose (0.5 µg) ragweed and 1018 ISS (20 µg) administered by the i.n. route for 16 weeks. Mice were rested for 2 weeks and given a final challenge with a single high dose (5 µg) of RW 24 hours before sacrifice or were not challenged before sacrifice. Control mice were sensitized by i.p. injection with ragweed, but exposed to saline weekly thereafter. Gene expression was analyzed using Mouse WG-6 v2 BeadChips (Illumina). Values represent fold induction in RW+1018 ISS-exposed mice in comparison to saline-exposed mice. Significance was evaluated by student's T test.
